# Supplementary material for: Constructing a confined space in silica nanopores: an ideal platform for the formation and dispersion of cuprous sites
Source: Royal Society of Chemistry journal article supplement (doi:10.1039/c3ta14760f), 2013-12-16
Supplement: c3ta14760f.pdf [file c3ta14760f.pdf]

## Electronic Supplementary Information

# Constructing confined space in silica nanopores: an ideal platform for the formation and dispersion of cuprous sites

Yu Yin, Peng Tan, Xiao-Qin Liu,\* Jing Zhu, and Lin-Bing Sun\*

*State Key Laboratory of Materials-Oriented Chemical Engineering, College of Chemistry and Chemical Engineering, Nanjing University of Technology, Nanjing 210009, China.*

*E-mail: liuxq@njut.edu.cn; lbsun@njut.edu.cn.*

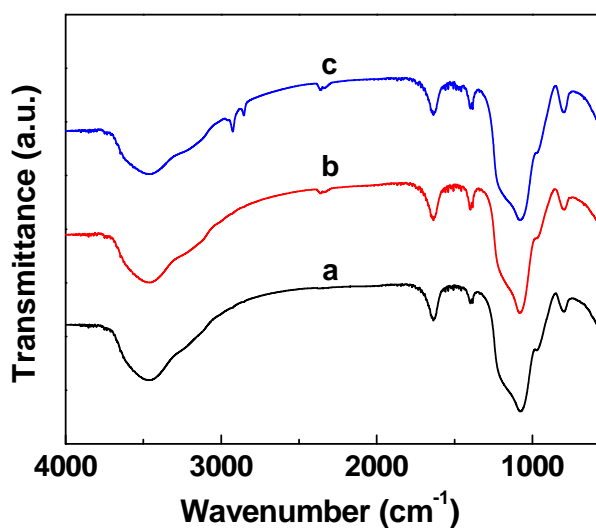

**Fig. S1** IR spectra of (a) CuAS, (b) CuAS treated in the solution of ammonia, and (c) CuAS treated in the solution of ammonia and CTAB.

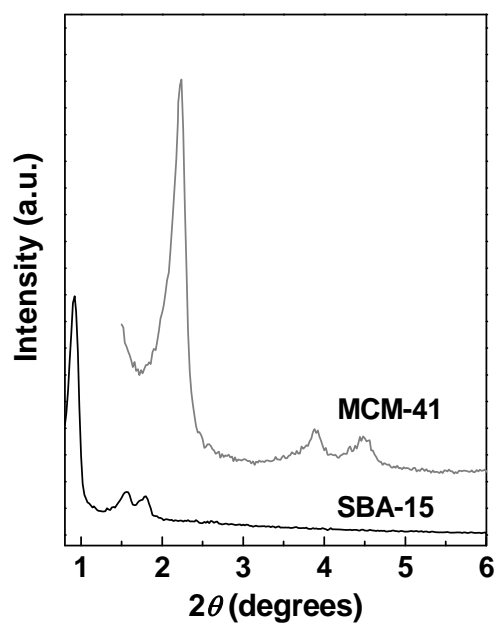

**Fig. S2** Low-angle XRD patterns of MCM-41 synthesized without addition of SBA-15 (SBA-15 is also included as a comparison).
